# Supplementary material
Source: publisher site journal article supplement (https://www.dovepress.com/article/578719)
Supplement: Supplementary file 1 [file 578719_Supplementary%20Material%20CLEAN.docx]

# Pharmacodynamic material basis of the components of four *Epimedium* species with activities against hepatocellular carcinoma based on biological target networks and multi-omics analysis

Xudong Liao1,2, Jinzhong Liu1, Zhenyu Pang1, Xin Li1, Dacheng Jiang2, Jian’an Wang1, Yunlong Sun1* and Bo Pang1*

*These authors should be co-corresponding authors.

1College of Pharmacy, Jining Medical University, Rizhao, Shandong 276826, P.R. China; 2College of Pharmacy, Changchun University of Chinese Medicine, Changchun, Jilin 130117, P.R. China

Correspondence: Dr Yunlong Sun and Dr Bo Pang, College of Pharmacy, Jining Medical University, 669 Xueyuan Road, Rizhao, Shandong 276826, P.R. China

E-mail: syloong@126.com

E-mail: pbb1996@126.com


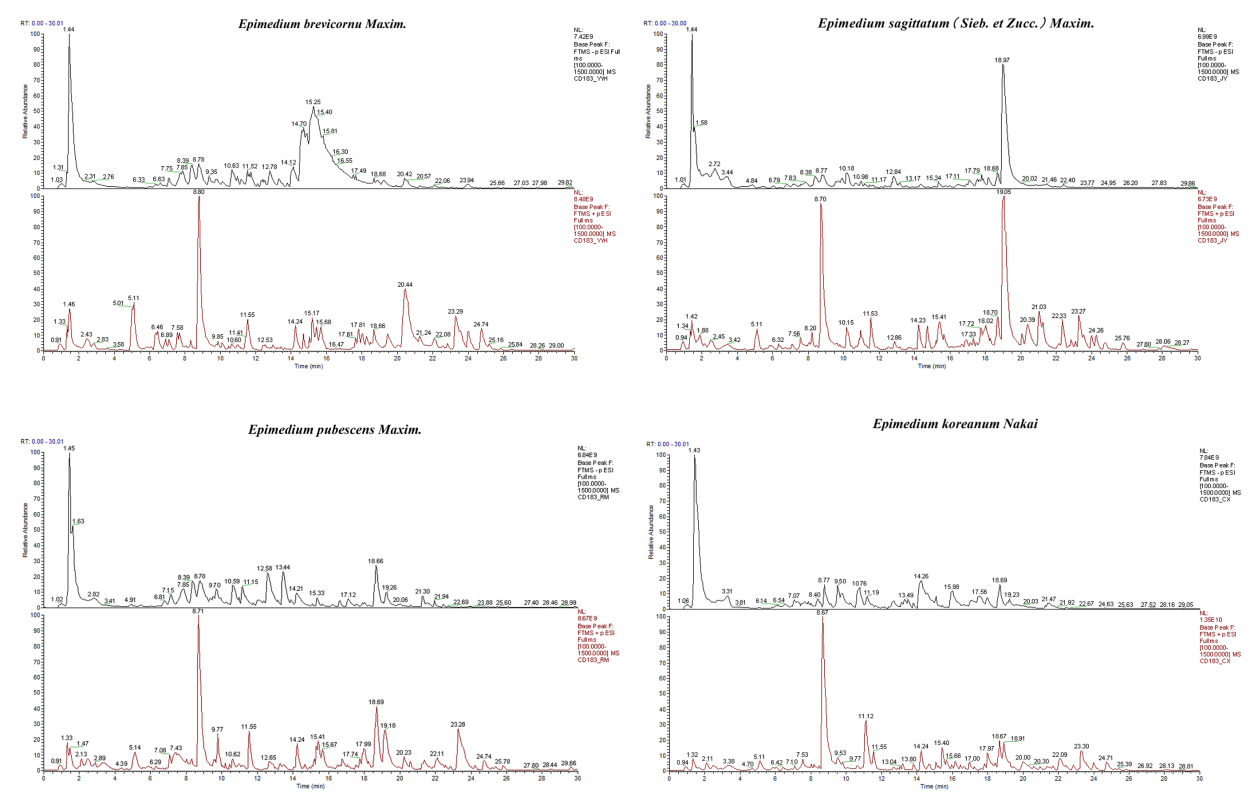


**Figure S1** LC-MS total ionogram of four varieties of *Epimedium* lyophilized powder extracts.


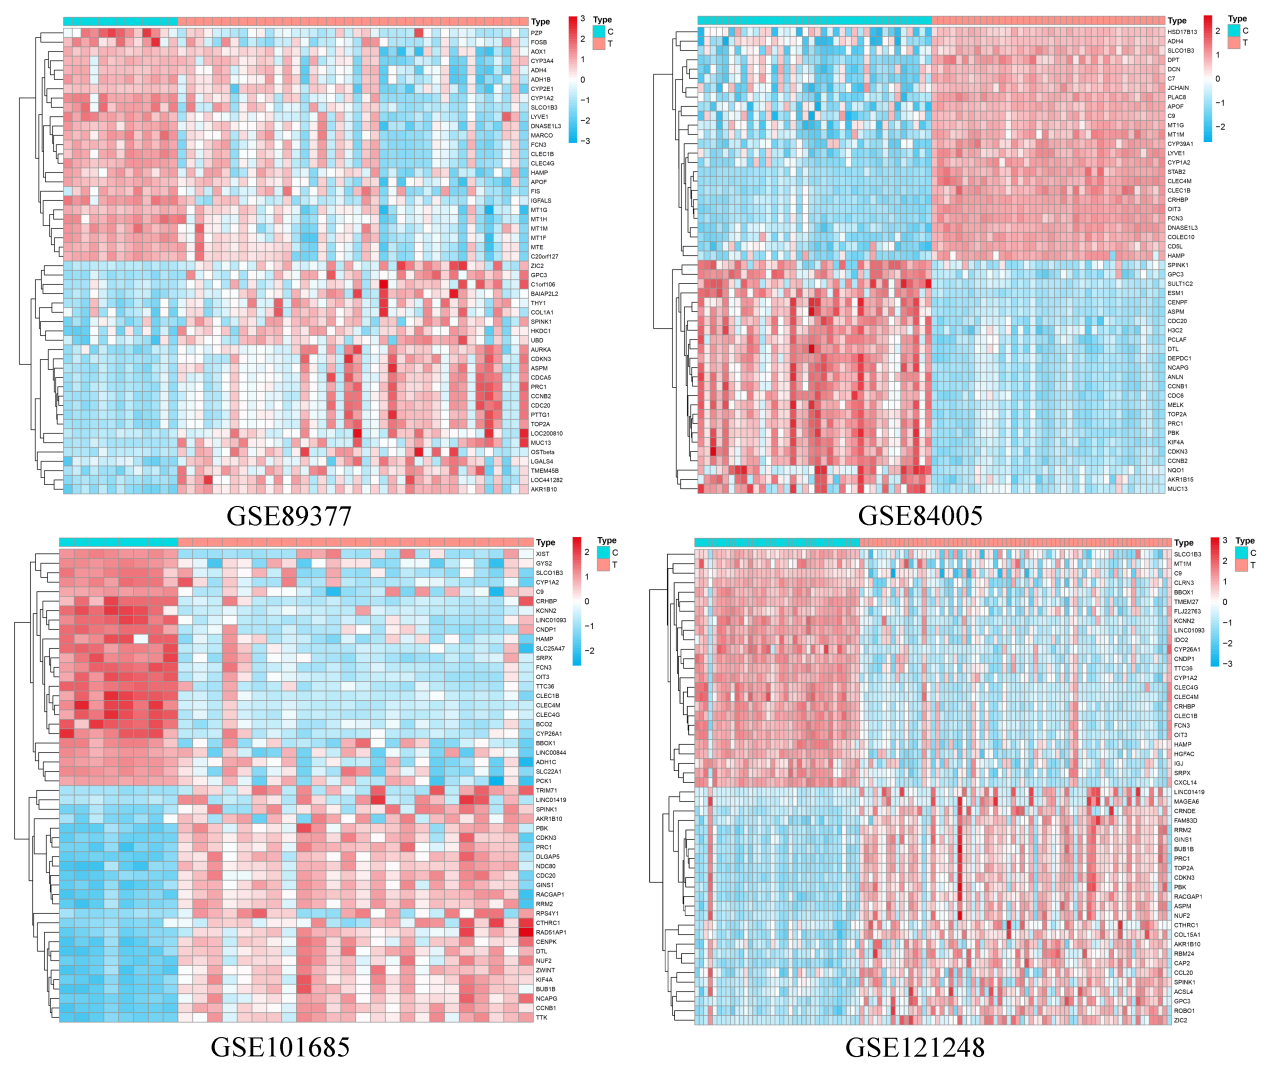


**Figure S2** Heat maps of four GEO chips.


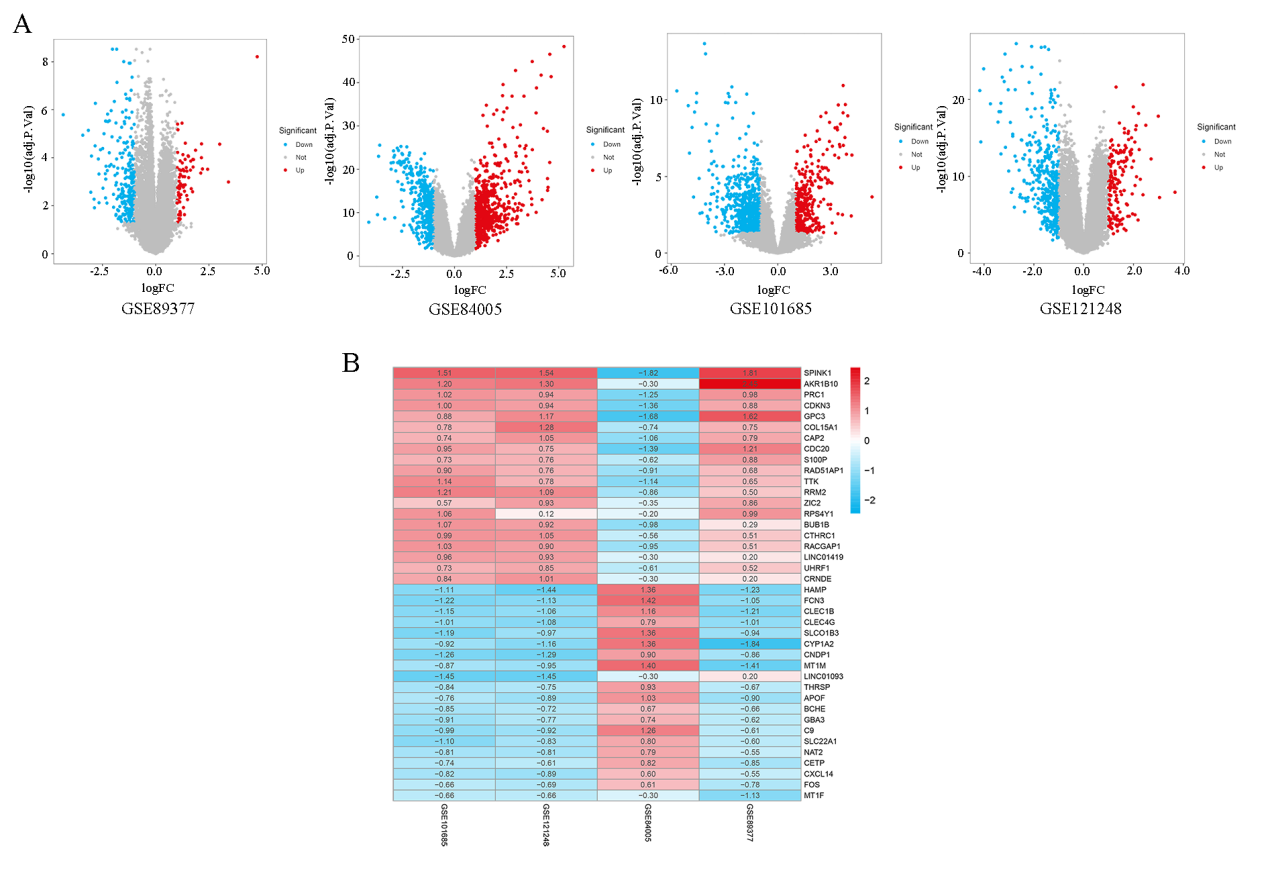


**Figure S3** Volcano maps of four GEO chips and the RRA.(A) Volcano maps of single GEO chips. (B) The heat map of the RRA.


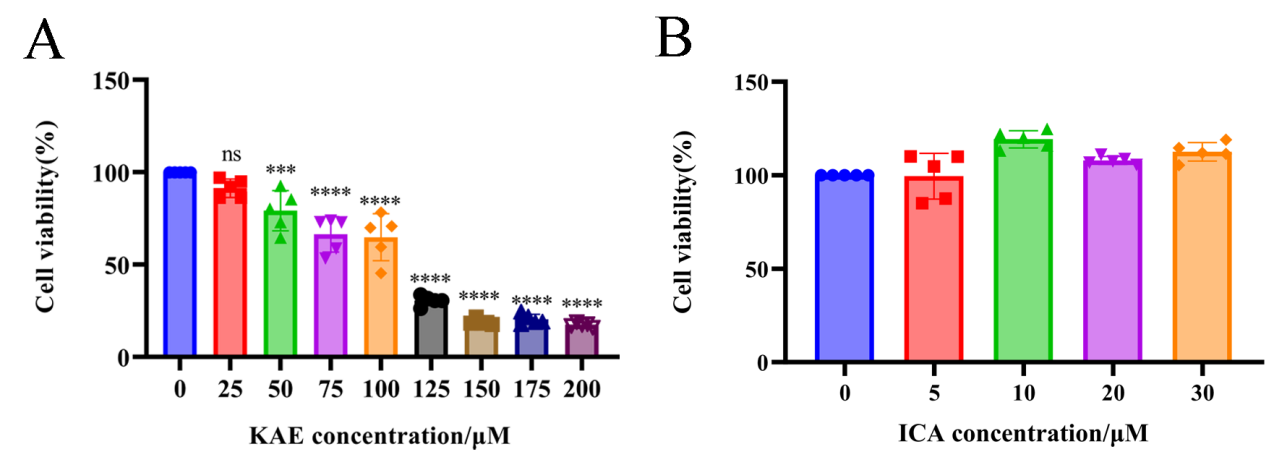


**Figure S4** Effects of monomer administration on HepG2 cells. (A)Kaempferol administration. (B)Icariin administration(ns, not significant, ***P<0.001, ****P<0.0001).


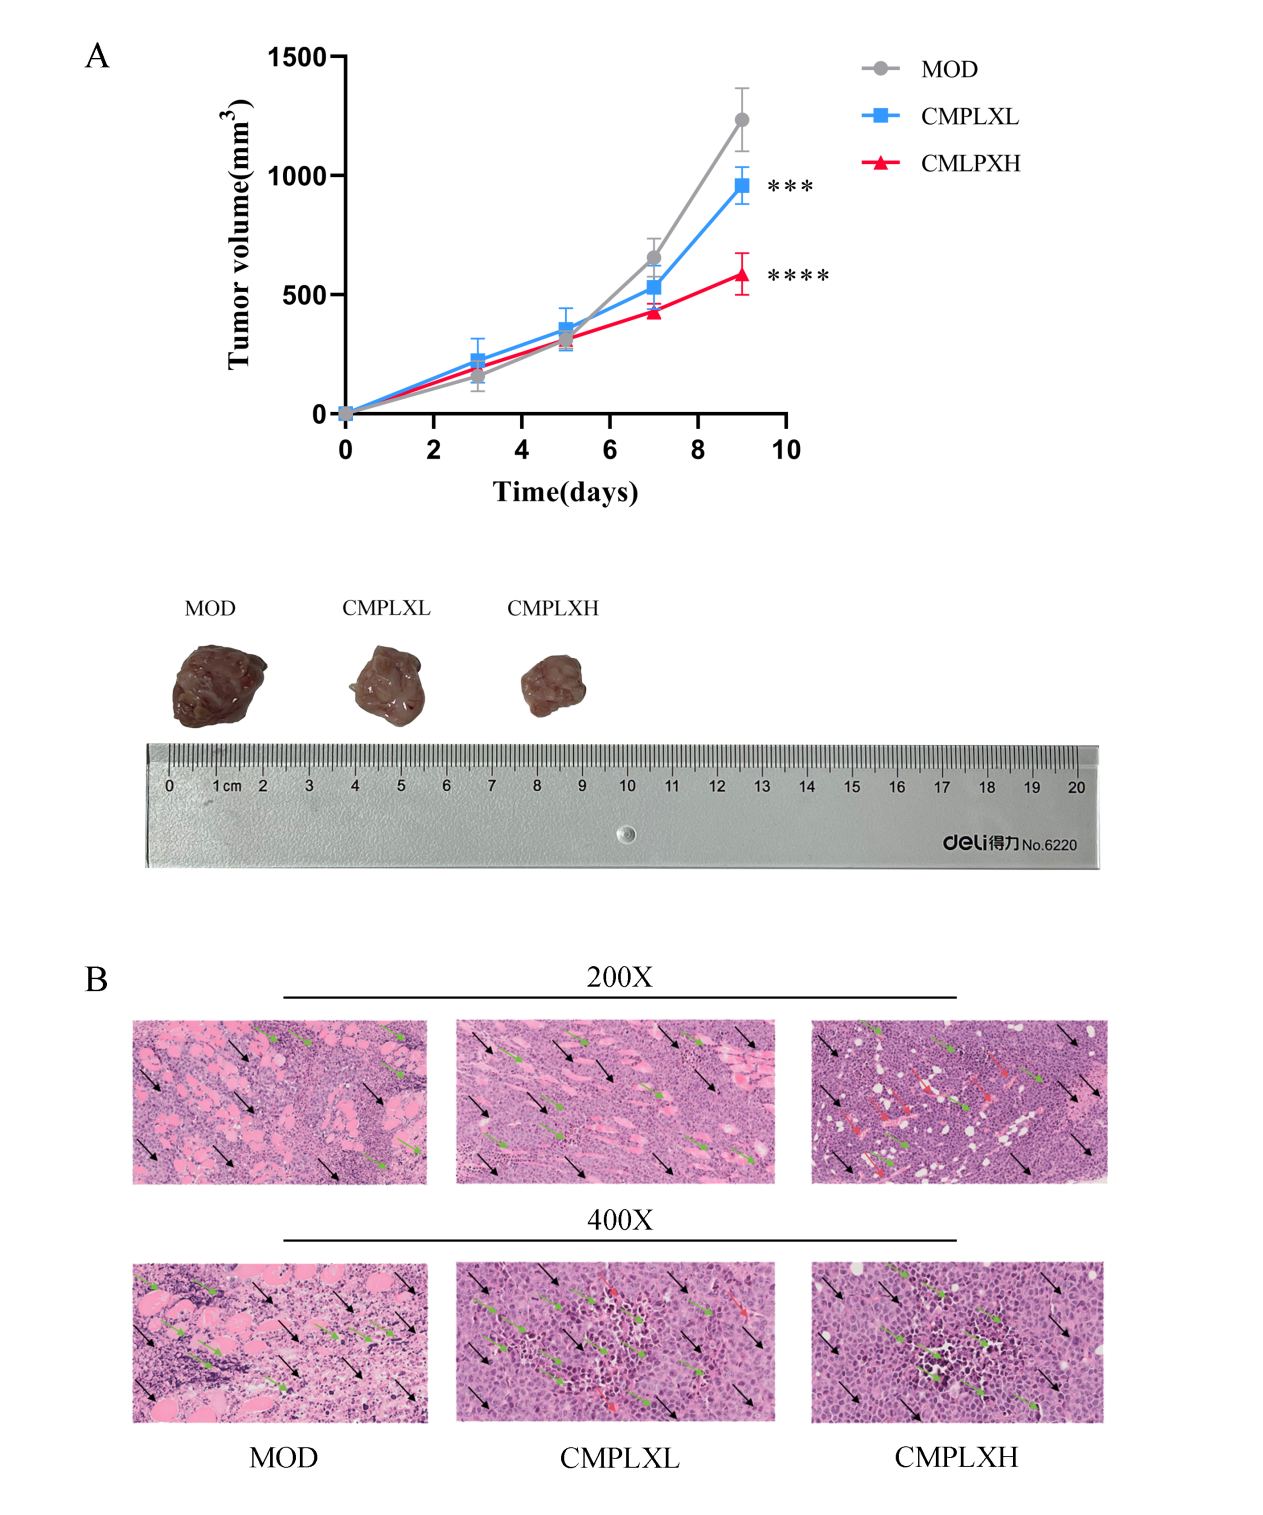


**Figure S5** (A)Changes of tumor volume.(B)HE staining in H22 loaded mice. Where black arrows point to intact or necrotic tissue fragment structures; green arrows point to cell cytoplasm; and red arrows point to mesenchymal vasculature(***P<0.001, ****P<0.0001).


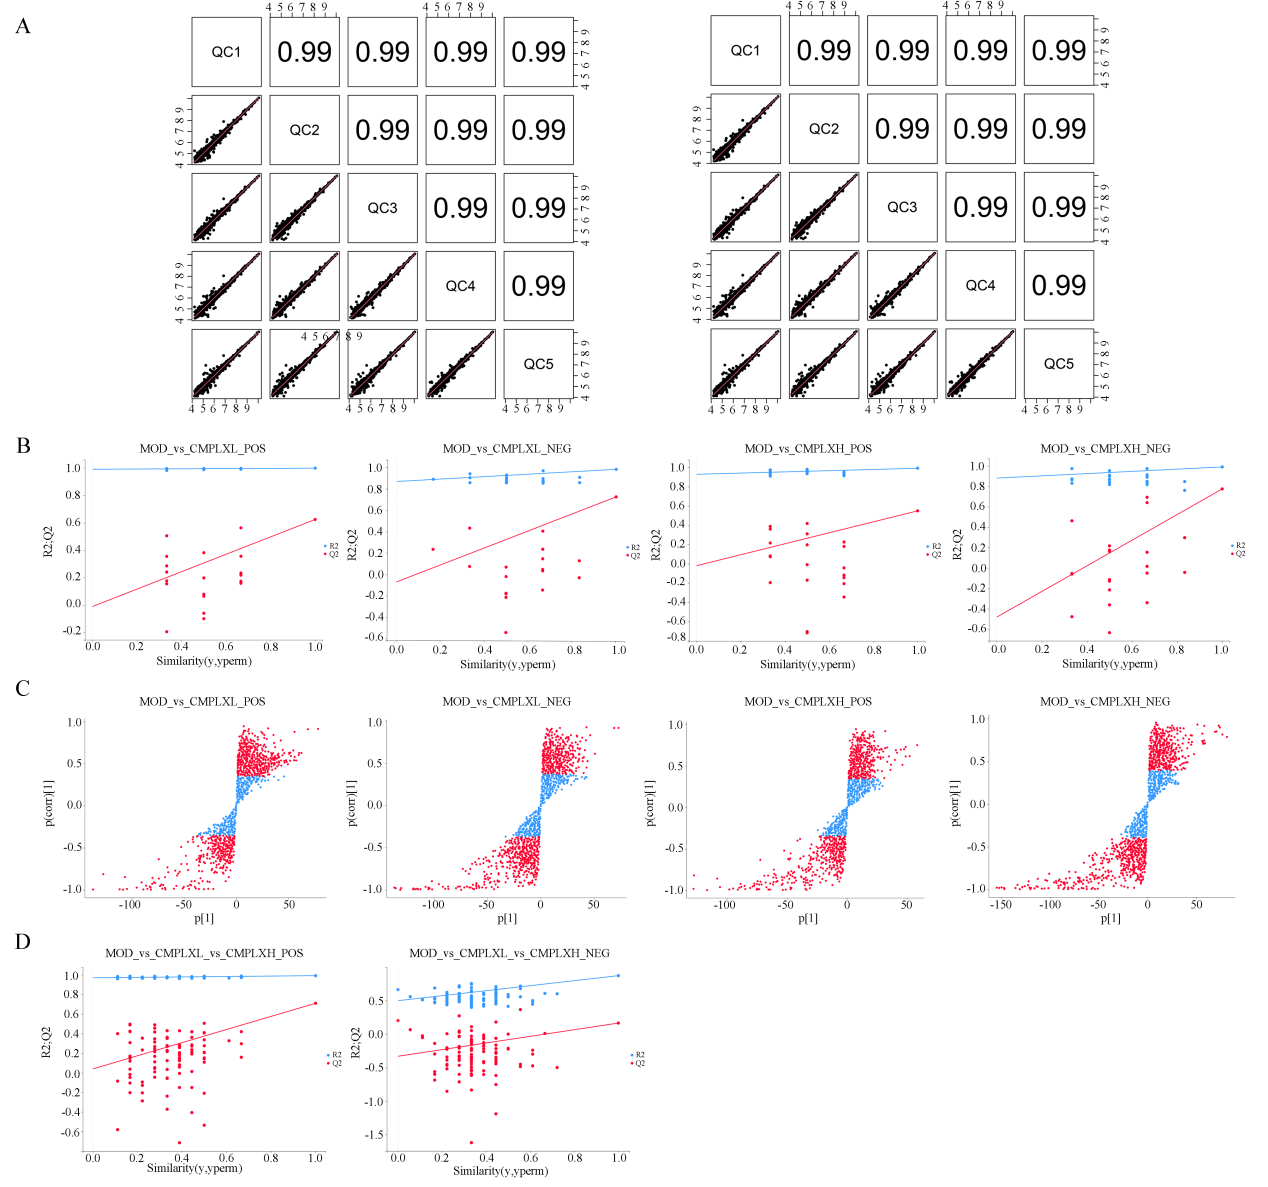


**Figure S6** (A) QC correlation analysis in positive and negative ion mode.(B) Substitution test. (C) S-plot diagram. The closer to the two corners the stronger the metabolite importance. (D) MOD_vs_CMPLXL_vs_CMPLXH substitution test plot in positive and negative ion mode.
